# Supplementary material for: Comparison of Three Nutritional Screening Tools with the New Glim Criteria for Malnutrition and Association with Sarcopenia in Hospitalized Older Patients
Source: PubMed Central journal article supplement (PMC7356988; doi:10.3390/jcm9061898), 2020-06-17
Supplement: jcm-09-01898-s001.pdf [file jcm-09-01898-s001.pdf]

**Table S1.** Main causes for hospital admission in patients stratified according to the Global Leadership Initiative on Malnutrition consensus.

|                                          | <b>No malnutrition<br/><i>n</i> = 82</b> | <b>Malnutrition<br/><i>n</i> = 70</b> | <b><i>p</i></b> |
|------------------------------------------|------------------------------------------|---------------------------------------|-----------------|
| <b>Heart failure (<i>n</i>, %)</b>       | 34 (41)                                  | 30 (43)                               | 0.8707          |
| <b>Respiratory failure (<i>n</i>, %)</b> | 12 (15)                                  | 9 (13)                                | 0.8167          |
| <b>Anemia (<i>n</i>, %)</b>              | 7 (9)                                    | 11 (16)                               | 0.2114          |
| <b>Acute renal failure (<i>n</i>, %)</b> | 7 (9)                                    | 3 (4)                                 | 0.3432          |
| <b>Pneumonia (<i>n</i>, %)</b>           | 14 (17)                                  | 10 (14)                               | 0.6631          |
| <b>Acute pancreatitis (<i>n</i>, %)</b>  | 2 (2)                                    | 0 (0)                                 | 0.4998          |
| <b>Other (<i>n</i>, %)</b>               | 6 (7)                                    | 7 (10)                                | 0.5754          |

Statistical differences were assessed by Pearson's Chi-squared test and Fisher's exact test.

**Table S2.** Assessment criteria of malnutrition according to the Global Leader Initiative on Malnutrition (GLIM)

| Phenotypic                                                                                                                                                                                                            | Etiologic                                                                                                                                                           |
|-----------------------------------------------------------------------------------------------------------------------------------------------------------------------------------------------------------------------|---------------------------------------------------------------------------------------------------------------------------------------------------------------------|
| <p><i>Non-volitional weight loss</i></p> <p>A weight loss &gt; 4.5 kg in the past year was reported and used as a threshold. Unintentional weight loss was obtained by clinical interview at baseline.</p>            | <p><i>Reduced food intake or assimilation</i></p> <p>The Mini-nutritional Assessment- Short Form (MNA-SF) item was used to determine reduced food intake</p>        |
| <p><i>Low body mass index</i></p> <p>BMI (kg/m<sup>2</sup>) was considered reduced if &lt;20 kg/m<sup>2</sup> or &lt;22 kg/m<sup>2</sup> in participants younger and older than 70 years, respectively.</p>           | <p><i>Disease burden/inflammatory condition</i></p> <p>Erythrocyte Sedimentation Rate and C-Reactive Protein were selected as biomarkers to assess inflammation</p> |
| <p><i>Reduced muscle mass</i></p> <p>FFMI &lt;17 kg/m<sup>2</sup> in men and &lt;15 kg/m<sup>2</sup> in women or ALMI &lt;7 kg/m<sup>2</sup> in men and &lt;5.5 kg/m<sup>2</sup> in women was used as a threshold</p> |                                                                                                                                                                     |

Diagnosis of malnutrition was performed when patients met at least 1 phenotypic and 1 etiologic criterion. BMI, Body Mass Index; FFMI, Fat-Free Mass Index; ALMI, Appendicular Lean Mass Index.

**Table S3.** Prevalence of criteria of the Global Leader Initiative on Malnutrition (GLIM) registered in the study population

|                                                        |            |
|--------------------------------------------------------|------------|
| <b>Phenotypic (n = 152)</b>                            |            |
| 1. <i>Non-volitional weight loss (n, %)</i>            | 48 (31.6)  |
| 2. <i>Low body mass index (n, %)</i>                   | 27 (17.8)  |
| 3. <i>Reduced muscle mass (n, %)</i>                   | 42 (27.6%) |
| <b>Etiologic (n = 152)</b>                             |            |
| a. <i>Reduced food intake or assimilation (n, %)</i>   | 107 (70.4) |
| b. <i>Disease burden/inflammatory condition (n, %)</i> | 96 (63.1)  |
| <b>Combined criteria (n = 70)</b>                      |            |
| • <i>1 + a (n, %)</i>                                  | 45 (64.3)  |
| • <i>1 + b (n, %)</i>                                  | 43 (61.4)  |
| • <i>2 + a (n, %)</i>                                  | 27 (38.6)  |
| • <i>2 + b (n, %)</i>                                  | 25 (35.7)  |
| • <i>3 + a (n, %)</i>                                  | 40 (57.1)  |
| • <i>3 + b (n, %)</i>                                  | 39 (55.7)  |

The prevalence of single criteria is indicated for the whole study population, while the prevalence of combined criteria is related to patients diagnosed with malnutrition.
